# Supplementary material for: Investigation on the growth aspects and properties of rubidium hydrogen succinate hydrate single crystal for NLO applications
Source: Royal Society of Chemistry journal article supplement (doi:10.1039/d3ra07579f), 2024-01-01
Supplement: d3ra07579f1.pdf [file d3ra07579f1.pdf]

## Electronic Supplementary Information (ESI)

**S. Kavitha**<sup>a, b</sup>, **R. Ezhil Vizhi**<sup>a\*</sup>

<sup>a</sup> Material Research Laboratory, Centre for Functional Materials, VIT University, Vellore 632014, Tamilnadu, India.

<sup>b</sup> Department of physics, school of advanced sciences, VIT University, Vellore 632014, Tamilnadu, India.

**Table S1: The structure refinement data for RbHSH crystal**

|                                   |                                                                               |
|-----------------------------------|-------------------------------------------------------------------------------|
| Theta range for data collection   | 2.73 to 28.28°                                                                |
| Index ranges                      | -10<=h<=10, -10<=k<=10, -10<=l<=10                                            |
| Reflections collected             | 11924                                                                         |
| Independent reflections           | 2106 [R(int) = 0.0456]                                                        |
| Structure solution technique      | direct methods                                                                |
| Structure solution program        | SHELXT 2018/2 (Sheldrick, 2018)                                               |
| Refinement method                 | Full-matrix least-squares on F <sup>2</sup>                                   |
| Refinement program                | SHELXL-2018/3 (Sheldrick, 2018)                                               |
| Function minimized                | $\Sigma w (F_o^2 - F_c^2)^2$                                                  |
| Data/restraints/parameters        | 2106 / 0 / 118                                                                |
| Goodness-of-fit on F <sup>2</sup> | 1.192                                                                         |
| Final R indices                   | 1932 data;<br>I>2σ(I) R1 = 0.0335, wR2 = 0.0817                               |
|                                   | all data R1 = 0.0386, wR2 = 0.0842                                            |
| Weighting scheme                  | $w=1/[\sigma^2(F_o^2) + (0.0445P)^2 + 0.0732P]$<br>where $P=(F_o^2+2F_c^2)/3$ |
| Largest diff. peak and hole       | 0.588 and -1.034 eÅ <sup>-3</sup>                                             |
| R.M.S. deviation from the mean    | 0.199 eÅ <sup>-3</sup>                                                        |

**Table S2: Bond lengths (Å) of the grown crystal**

| Atoms    | Bond length | Atoms    | Bond length |
|----------|-------------|----------|-------------|
| Rb1-O2   | 2.827(2)    | Rb1-O3#4 | 2.930(2)    |
| Rb1-O4#6 | 2.955(2)    | Rb1-O4#2 | 2.979(2)    |

|           |           |           |           |
|-----------|-----------|-----------|-----------|
| Rb1-O6#3  | 2.995(2)  | Rb1-O6#4  | 3.077(2)  |
| Rb1-O7#1  | 3.090(2)  | Rb1-C9#6  | 3.545(3)  |
| Rb1-Rb1#6 | 4.3442(7) | Rb1-Rb1#5 | 4.4078(8) |
| O2-C8     | 1.260(3)  | O4-C11    | 1.215(3)  |
| O3-C8     | 1.247(3)  | O7-C12    | 1.326(3)  |
| O6-C12    | 1.209(3)  | O5-C11    | 1.310(3)  |
| O5-H5     | 0.820000  | C8-C9     | 1.526(4)  |
| C12-C13   | 1.511(4)  | C11-C10   | 1.497(4)  |
| C13-C13#7 | 1.508(5)  | C13-H13A  | 0.970000  |
| C13-H13B  | 0.970000  | C9-C10    | 1.516(4)  |
| C9-H9A    | 0.970000  | C9-H9B    | 0.970000  |
| C10-H10A  | 0.970000  | C10-H10B  | 0.970000  |

**Table.S3: Bond angles of the RbHSH crystal**

| Atoms         | Bond angles | Atoms          | Bond angles |
|---------------|-------------|----------------|-------------|
| O2-Rb1-O3#7   | 75.73(6)    | O2-Rb1-O4#9    | 143.57(6)   |
| O3#7-Rb1-O4#9 | 128.22(6)   | O2-Rb1-O4#3    | 70.68(6)    |
| O3#7-Rb1-O4#3 | 83.66(6)    | O4#9-Rb1-O4#3  | 84.07(6)    |
| O2-Rb1-O6#5   | 79.08(7)    | O3#7-Rb1-O6#5  | 146.89(6)   |
| O4#9-Rb1-O6#5 | 84.48(6)    | O4#3-Rb1-O6#5  | 107.86(6)   |
| O2-Rb1-O6#7   | 90.43(6)    | O3#7-Rb1-O6#7  | 70.55(5)    |
| O4#9-Rb1-O6#7 | 121.63(6)   | O4#3-Rb1-O6#7  | 151.31(6)   |
| O6#5-Rb1-O6#7 | 88.64(5)    | O2-Rb1-O7#1    | 145.88(6)   |
| O3#7-Rb1-O7#1 | 70.16(6)    | O4#9-Rb1-O7#1  | 64.56(6)    |
| O4#3-Rb1-O7#1 | 103.99(6)   | O6#5-Rb1-O7#1  | 132.40(6)   |
| O6#7-Rb1-O7#1 | 79.36(6)    | O2-Rb1-C9#9    | 140.56(6)   |
| O3#7-Rb1-C9#9 | 127.12(6)   | O4#9-Rb1-C9#9  | 52.02(6)    |
| O4#3-Rb1-C9#9 | 135.43(6)   | O6#5-Rb1-C9#9  | 65.57(6)    |
| O6#7-Rb1-C9#9 | 72.52(6)    | O7#1-Rb1-C9#9  | 66.88(6)    |
| O2-Rb1-Rb1#9  | 82.80(4)    | O3#7-Rb1-Rb1#9 | 109.97(4)   |

|                 |             |                 |            |
|-----------------|-------------|-----------------|------------|
| O4#9-Rb1-Rb1#9  | 107.76(4)   | O4#3-Rb1-Rb1#9  | 146.38(4)  |
| O6#5-Rb1-Rb1#9  | 45.08(4)    | O6#7-Rb1-Rb1#9  | 43.56(4)   |
| O7#1-Rb1-Rb1#9  | 109.52(4)   | C9#9-Rb1-Rb1#9  | 60.15(4)   |
| O2-Rb1-Rb1#8    | 108.41(4)   | O3#7-Rb1-Rb1#8  | 109.89(4)  |
| O4#9-Rb1-Rb1#8  | 42.24(4)    | O4#3-Rb1-Rb1#8  | 41.83(4)   |
| O6#5-Rb1-Rb1#8  | 98.21(4)    | O6#7-Rb1-Rb1#8  | 160.82(4)  |
| O7#1-Rb1-Rb1#8  | 82.84(4)    | C9#9-Rb1-Rb1#8  | 93.95(4)   |
| Rb1#9-Rb1-Rb1#8 | 140.119(13) | C8-O2-Rb1       | 133.67(18) |
| C11-O4-Rb1#9    | 130.95(18)  | C11-O4-Rb1#4    | 130.08(18) |
| Rb1#9-O4-Rb1#4  | 95.93(6)    | C8-O3-Rb1#7     | 126.58(18) |
| C12-O7-Rb1#6    | 119.53(16)  | C12-O6-Rb1#2    | 146.07(18) |
| C12-O6-Rb1#7    | 121.79(18)  | Rb1#2-O6-Rb1#7  | 91.36(5)   |
| C11-O5-H5       | 109.500000  | O3-C8-O2        | 125.7(3)   |
| O3-C8-C9        | 119.3(2)    | O2-C8-C9        | 115.0(2)   |
| O6-C12-O7       | 123.2(3)    | O6-C12-C13      | 124.8(2)   |
| O7-C12-C13      | 112.0(2)    | O4-C11-O5       | 123.9(3)   |
| O4-C11-C10      | 125.7(2)    | O5-C11-C10      | 110.3(2)   |
| C13#10-C13-C12  | 113.8(3)    | C13#10-C13-H13A | 108.800000 |
| C12-C13-H13A    | 108.800000  | C13#10-C13-H13B | 108.800000 |
| C12-C13-H13B    | 108.800000  | H13A-C13-H13B   | 107.700000 |
| C10-C9-C8       | 113.3(2)    | C10-C9-Rb1#9    | 107.00(16) |
| C8-C9-Rb1#9     | 138.85(17)  | C10-C9-H9A      | 108.900000 |
| C8-C9-H9A       | 108.900000  | Rb1#9-C9-H9A    | 47.500000  |
| C10-C9-H9B      | 108.900000  | C8-C9-H9B       | 108.900000 |
| Rb1#9-C9-H9B    | 63.600000   | H9A-C9-H9B      | 107.700000 |
| C11-C10-C9      | 116.2(2)    | C11-C10-H10A    | 108.200000 |
| C9-C10-H10A     | 108.200000  | C11-C10-H10B    | 108.200000 |
| C9-C10-H10B     | 108.200000  | H10A-C10-H10B   | 107.400000 |

**Table.S4: Hydrogen bond distances (Å) and angles (°) of RbHSH crystal**

|                  | Donor-H | Acceptor-H | Donor-Acceptor | Angle |
|------------------|---------|------------|----------------|-------|
| O5-H5...O2#1     | 0.82    | 1.72       | 2.528(3)       | 169.3 |
| C10-H10B... O2#2 | 0.97    | 2.63       | 3.579(4)       | 166.1 |

**Table.S5: Hydrogen atomic coordinates and isotropic atomic displacement parameters ( $\text{\AA}^2$ ) for RbHSH.**

|      | x/a    | y/b     | z/c     | U(eq)    |
|------|--------|---------|---------|----------|
| H5   | 0.7457 | 0.5159  | 1.1826  | 0.059000 |
| H13A | 1.0815 | 0.1441  | -0.0325 | 0.026000 |
| H13B | 1.1713 | -0.0587 | 0.0501  | 0.026000 |
| H9A  | 0.7660 | 0.6998  | 0.6029  | 0.025000 |
| H9B  | 0.5601 | 0.6620  | 0.7015  | 0.025000 |
| H10A | 0.7208 | 0.3801  | 0.8568  | 0.029000 |
| H10B | 0.9126 | 0.4434  | 0.7728  | 0.029000 |

**Table.S6: lists the numerous functional groups present in the compound.**

| Wave numbers( $\text{cm}^{-1}$ ) | Assignments                          |
|----------------------------------|--------------------------------------|
| 2932                             | CH <sub>2</sub> stretching vibration |
| 2535                             | Atmospheric CO <sub>2</sub>          |

|              |                                                    |
|--------------|----------------------------------------------------|
| 1684         | C=O stretching vibration                           |
| 1415         | symmetric stretching vibration of COO <sup>-</sup> |
| 1299         | C-O-H bending vibration                            |
| 1199-1178    | C-O stretching vibration                           |
| 1042         | C=O bending vibration                              |
| 804          | C-H deformation                                    |
| 714-631      | metal-oxygen vibration                             |
| 471, and 561 | presence of metal complexes                        |

**Table.S7: Mechanical parameters of the RbHSH crystal**

| Load P (gm) | H <sub>v</sub> (Kg/mm <sup>2</sup> ) | C11 × 10 <sup>14</sup> Pa | σ <sub>y</sub> (Kg/mm <sup>2</sup> ) |
|-------------|--------------------------------------|---------------------------|--------------------------------------|
| 10          | 95.63415                             | 2924.642                  | 31.87805                             |
| 20          | 85.02849                             | 2380.882                  | 28.34283                             |
| 30          | 70.42997                             | 1712.283                  | 23.47666                             |
| 50          | 61.24223                             | 1340.723                  | 20.41408                             |
| 80          | 52.0346                              | 1008.118                  | 17.34487                             |
| 90          | 42.76095                             | 715.044                   | 14.25365                             |

**Table.S8: Amplitude parameters of the grown RbHSH crystal measured by AFM**

| S.NO | Amplitude parameters                | Value               |
|------|-------------------------------------|---------------------|
| 1    | Area Roughness                      | 618 pm <sup>2</sup> |
| 2    | Roughness average (S <sub>a</sub> ) | 97.076nm            |

---

|   |                              |            |
|---|------------------------------|------------|
| 3 | Root mean square ( $S_q$ )   | 160.24nm   |
| 4 | Peak-valley height ( $S_y$ ) | 2044.6nm   |
| 5 | Peak height ( $S_p$ )        | 844.51nm   |
| 6 | Valley depth ( $S_v$ )       | -1200.1nm  |
| 7 | The mean value ( $S_m$ )     | -10.014pm  |
| 8 | Image size                   | 25 $\mu$ m |

---
